# Supplementary material for: Pathway Compartmentalization in Peroxisome of Saccharomyces cerevisiae to Produce Versatile Medium Chain Fatty Alcohols
Source: PubMed Central journal article supplement (PMC4882508; doi:10.1038/srep26884), 2016-05-27
Supplement: srep26884-s1.pdf [file srep26884-s1.pdf]

Submitted to *Scientific Reports*

**Pathway Compartmentalization in Peroxisome of *Saccharomyces cerevisiae* to  
Produce Versatile Medium Chain Fatty Alcohols**

Jiayuan Sheng<sup>†</sup>, Joseph Stevens<sup>†</sup>, Xueyang Feng<sup>\*</sup>

Department of Biological Systems Engineering, Virginia Polytechnic Institute and  
State University, Blacksburg, VA 24061

<sup>†</sup> Jiayuan Sheng and Joseph Stevens contributed equally to this work.

<sup>\*</sup> To whom correspondence should be addressed. X.F: Phone: (540) 231-2974; E-mail:  
xueyang@vt.edu.

Figure S1

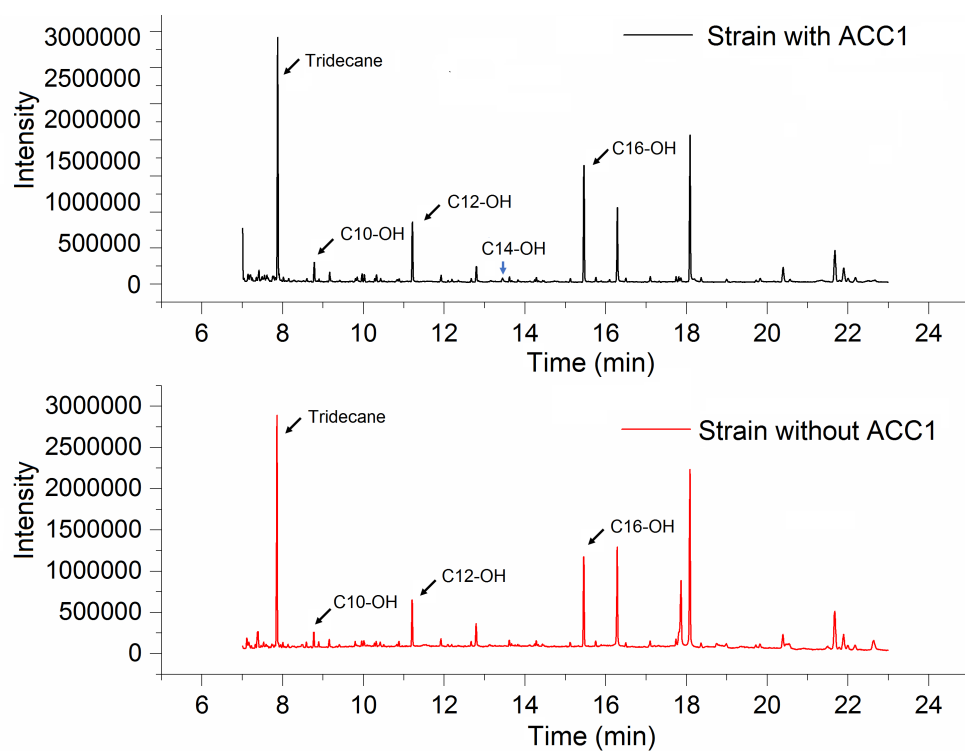

Figure S1: The GC spectrum of fatty alcohols produced by the strains with or without ACC1 overexpressed. Both of the strains were constructed in *S. cerevisiae* BY4741 with TaFAR expressed under constitutive TEF1 promoter and tagged with the PTS2 peptide (KL-QL) and the PEX7 was expressed under constitutive TPI1 promoter.

Figure S2

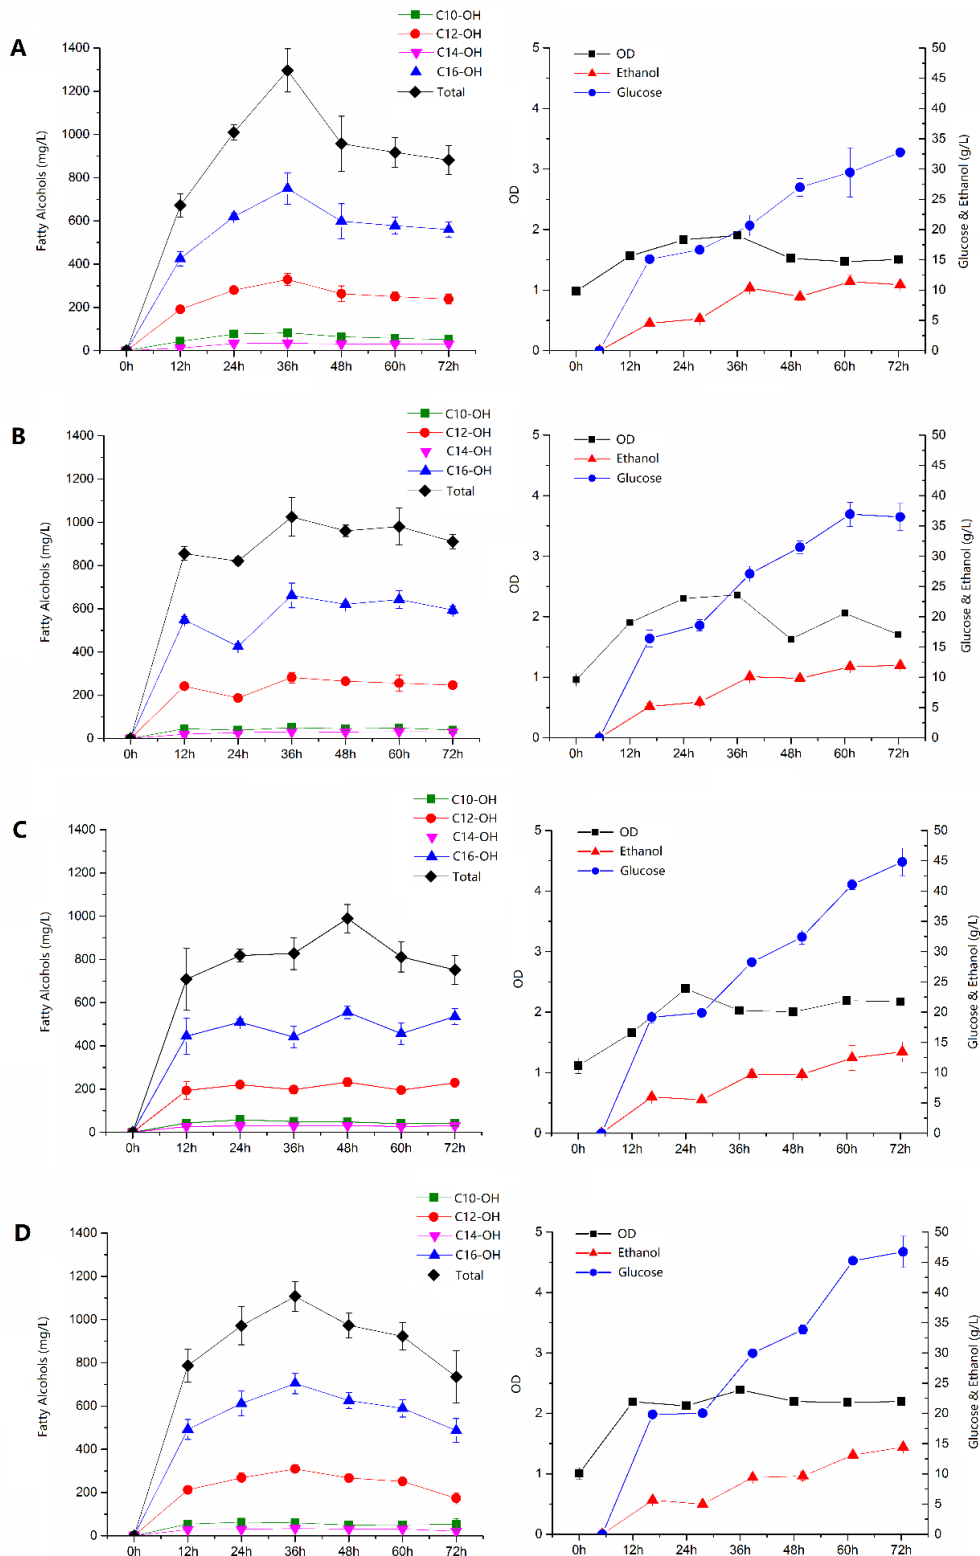

Figure S2. Medium optimization and fed-batch fermentation. (A) Nitrogen limited SC medium with C:N ratio at 50:1; (B) Nitrogen limited SC medium with C:N ratio at 50:1, supplement of 40 mM KCl and 10 mM KOH.; (C) Normal SC medium (control condition with C:N ratio at 3:1); and (D) Normal SC medium with supplement of 40 mM KCl and 10 mM KOH.

Figure S3

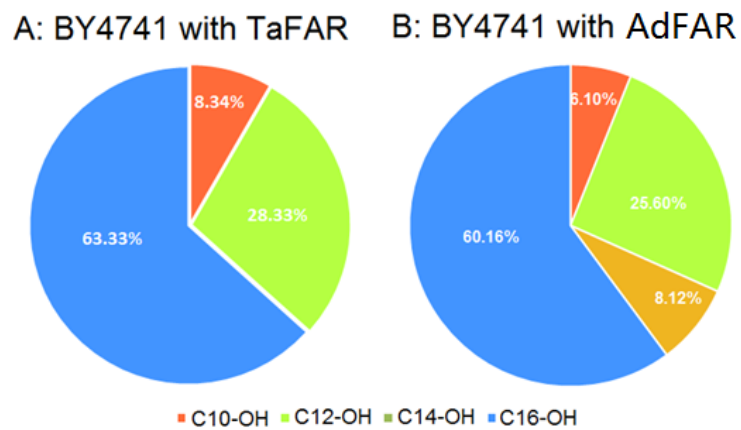

Figure S3: Profiles of fatty alcohols produced by expressing different FAR enzymes in peroxisome. (A) Strain MFAOH31 with TaFAR expressed in peroxisome (8.34% 1-decanol, 28.33% 1-dodecanol and 63.33% 1-hexadecanol); (B) Strain MFAOH38 with AdFAR1 expressed in peroxisome (6.10% 1-decanol, 26.60% 1-dodecanol, 8.12% 1-tetradecanol and 60.16% 1-hexadecanol).

**Table S1** The primers used in this study.

| <b>Name</b>   | <b>Sequence (5'-3')</b>                                                                               |
|---------------|-------------------------------------------------------------------------------------------------------|
| TEF1p F       | AAAGAAAGCATAGCAATCTAATCTAAGTTTAAATTACAAAATGGTTTCCATACCTGAATA                                          |
| TEF1t R       | GCGCAATTAACCCCTCACTAAAGGGAACAAAAGCTGGAGCTCGATAGCGCCGATCAAAGTA                                         |
| TaFAR-SKL R   | ATATAAAAGATATGCAACTAGAAAAGTCTTATCAATCTCCTCATAGCTTGGAGTATCTCA                                          |
| TaFAR-SKF R   | ATATAAAAGATATGCAACTAGAAAAGTCTTATCAATCTCCTCAGAAGCTTGGAGTATCTCA                                         |
| TaFAR-SFL R   | ATATAAAAGATATGCAACTAGAAAAGTCTTATCAATCTCCTCATAGGAAGGAGTATCTCA                                          |
| TaFAR-SKV R   | ATATAAAAGATATGCAACTAGAAAAGTCTTATCAATCTCCTCAAACCTTGGAGTATCTCA                                          |
| TaFAR-LKL R   | ATATAAAAGATATGCAACTAGAAAAGTCTTATCAATCTCCTCATAGCTTAGGTATCTCA                                           |
| TaFAR-FKL R   | ATATAAAAGATATGCAACTAGAAAAGTCTTATCAATCTCCTCATAGCTTGAAGTATCTCA                                          |
| TaFAR-SHL R   | ATATAAAAGATATGCAACTAGAAAAGTCTTATCAATCTCCTCATAGATGGGAGTATCTCA                                          |
| TEF1t-SKL F   | CTTCAGAGCCTCCAGTACTATGAGATACTCCAAGCTATGAGGAGATTGATAAGACTTTTC                                          |
| TEF1t-SKF F   | CTTCAGAGCCTCCAGTACTATGAGATACTCCAAGTTCTGAGGAGATTGATAAGACTTTTC                                          |
| TEF1t-SFL F   | CTTCAGAGCCTCCAGTACTATGAGATACTCCTCCTATGAGGAGATTGATAAGACTTTTC                                           |
| TEF1t-SKV F   | CTTCAGAGCCTCCAGTACTATGAGATACTCCAAGTTTGAGGAGATTGATAAGACTTTTC                                           |
| TEF1t-LKL F   | CTTCAGAGCCTCCAGTACTATGAGATACTCAAAGCTATGAGGAGATTGATAAGACTTTTC                                          |
| TEF1t-FKL F   | CTTCAGAGCCTCCAGTACTATGAGATACTTCAAGCTATGAGGAGATTGATAAGACTTTTC                                          |
| TEF1t-SHL F   | CTTCAGAGCCTCCAGTACTATGAGATACTCCATCTATGAGGAGATTGATAAGACTTTTC                                           |
| RV-QL F       | AAAGAAAGCATAGCAATCTAATCTAAGTTTAAATTACAAAATGAGTCAACGTGTTCAAAGTATTA<br>AAGATCAACTTGTTTCCATACCTGAATATTAT |
| KL-QL F       | AAAGAAAGCATAGCAATCTAATCTAAGTTTAAATTACAAAATGAGTCAAAAACCTCAAAGTATTA<br>AAGATCAACTTGTTTCCATACCTGAATATTAT |
| KI-QL F       | AAAGAAAGCATAGCAATCTAATCTAAGTTTAAATTACAAAATGAGTCAAAAAATCAAAGTATTA<br>AAGATCAACTTGTTTCCATACCTGAATATTAT  |
| KV-HL F       | AAAGAAAGCATAGCAATCTAATCTAAGTTTAAATTACAAAATGAGTCAAAAAGTTCAAAGTATTA<br>AAGATCATCTTGTTTCCATACCTGAATATTAT |
| TEF1p RV-QL R | AAAGAAAGCATAGCAATCTAATCTAAGTTTAAATTACAAAATGAGTCAACGTGTTCAAAG                                          |
| TEF1p KL-QL R | AAAGAAAGCATAGCAATCTAATCTAAGTTTAAATTACAAAATGAGTCAAAAACCTCAAAG                                          |
| TEF1p KI-QL R | AAAGAAAGCATAGCAATCTAATCTAAGTTTAAATTACAAAATGAGTCAAAAAATCAAAG                                           |
| TEF1p KV-HL R | AAAGAAAGCATAGCAATCTAATCTAAGTTTAAATTACAAAATGAGTCAAAAAGTTCAAAG                                          |
| PEX5 F        | AAAGAAAGCATAGCAATCTAATCTAAGTTTAAATTACAAAATGGACGTAGGAAGTTGCTC                                          |
| PEX5 R        | ATATAAAAGATATGCAACTAGAAAAGTCTTATCAATCTCCTTAAAACGAAAATTCCTCTT                                          |
| TEP1p PEX5 R  | CAAGCGGATTATTTCCCACTGAGCAACTCCTACGTCCATTTTGTAAATAAAACCTTAGAT                                          |
| TEP1t PEX5 F  | CATGGACCTGAAAAGATTTAAAGGAGAATTTTCGTTTTAAGGAGATTGATAAGACTTTTC                                          |
| PEX7 F1       | AAAGAAAGCATAGCAATCTAATCTAAGTTTAAATTACAAAATGCTCAGATATCATATGCA                                          |
| PEX7 R1       | ATATAAAAGATATGCAACTAGAAAAGTCTTATCAATCTCCTCAACCTAAGCCGTTCCATA                                          |
| TEF1p PEX7 R  | CACCGTACCCACTAAAACCTTGATATGATATCTGAGCATTGTAATAAAACCTTAGAT                                             |
| TEF1t PEX7 F  | ATGGGATGGAAATTTATTTGTATGGAACGGCTTAGGTTGAGGAGATTGATAAGACTTTTC                                          |
| TPI1p F       | ATTCGATATTGTCGTAACAAATACTTTGATCGGCGTATCTATATCTAGGAACCCATCAG                                           |
| TPI1p PEX7 R  | CACCGTACCCACTAAAACCTTGATATGATATCTGAGCATTGTTAGTTTATGTATGTGTT                                           |
| PEX7 F2       | TTAAATCTATAACTACAAAAACACATACATAAACTAAAATGCTCAGATATCATATGCA                                            |
| PEX7 R2       | TAACATAATTACATGATATCGACAAAGGAAAAGGGCCTGTTCAACCTAAGCCGTTCCATA                                          |

|                 |                                                                |
|-----------------|----------------------------------------------------------------|
| CYC1t PEX7 F    | ATGGGATGGAAATTTATTTGTATGGAACGGCTTAGGTTGAACAGGCCCTTTTCCTTTGT    |
| CYC1t R         | CCACCGCGGTGGCGGCCGCTCTAGAACTAGTGGATCCCCGCAAATTAAGCCTTCGAGC     |
| TEF1p PEX3 R    | GTCTCTGCAGAAGCGAACGTGATCTTTGATTTGGGGCCATTTTGTAAATAAAACCTAGAT   |
| PEX3 F          | AAAGAAAGCATAGCAATCTAATCTAAGTTTAAATTACAAAATGGCCCCAAATCAAAGATC   |
| PEX3 R          | ATATAAAAGATATGCAACTAGAAAAGTCTTATCAATCTCCTTAAGGCTTGAAGGAAAACG   |
| TEF1t PEX3 F    | CAACTTTGGCGTCTCCAGCTCGTTTTCTTCAAGCCTTAAGGAGATTGATAAGACTTTTC    |
| TPI1p PEX19 R   | ACTCGTTTTTCATTACTTTCGTTGTATGTTTGGCATTTTTAGTTTATGTATGTGTT       |
| PEX19 F         | TTAAATCTATAACTACAAAAACACATACATAAACTAAAAATGCCAAACATACAACACGA    |
| PEX19 R         | TAACATAATTACATGATATCGACAAAGGAAAAGGGCCTGTTTATTGTTGTTTGAACCGT    |
| CYC1t PEX19 F   | CCTTGATAAGGAATTAACCGACGGTTGCAAAACAATAAACAGGCCCTTTTCCTTTGT      |
| TEF1p PEX14 R   | CGAACAAATGCCTTACGATCTTTACTGACCACGTCACCTCATTTTGTAAATAAAACCTAGAT |
| PEX14F          | AAAGAAAGCATAGCAATCTAATCTAAGTTTAAATTACAAAATGAGTGACGTGGTCAGTAA   |
| PEX14R          | CTTTAGACATACCACCAGATTGAAAATACAAATTTTACCTGGGATGGAGTCTTCGACCT    |
| GFP F           | CTCCATCCCAGGTGAAAAATTTGTATTTTCAATCTGGTGGTATGCTAAAGGTGAAGAATT   |
| GFP R           | ATATAAAAGATATGCAACTAGAAAAGTCTTATCAATCTCCTTATTTGTACAATTCATCCA   |
| TEF1t GFP F     | TGCTGGTATTACCCATGGTATGGATGAATTGTACAAATAAGGAGATTGATAAGACTTTTC   |
| TaFAR mcherry R | TGCTAACCATAACCACCAGATTGAAAATACAAATTTTACCGTATCTCATAGTACTGGAGG   |
| Cherry F        | TATGAGATACGGTGAAAAATTTGTATTTTCAATCTGGTGGTATGGTTAGCAAAGGCGAGGA  |
| Cherry R        | ATATAAAAGATATGCAACTAGAAAAGTCTTATCAATCTCCTTATAGCTTGAACCACCAG    |
| TEF1t cherry F  | TGAAAAATTTGTATTTTCAATCTGGTGGTCCAAAGCTATAAGGAGATTGATAAGACTTTTC  |
| AdFAR F         | AAAGAAAGCATAGCAATCTAATCTAAGTTTAAATTACAAAATGTCTCAAAGACTACAAAG   |
| AdFAR R         | ATAAAAGATATGCAACTAGAAAAGTCTTATCAATCTCCTTATAGCTTGGAGTAACGCATG   |
| TEF1P_AdFAR R   | CCAAATGATCCTTGATACTTTGTAGTCTTTGAGACATTTTGTAAATAAAACCTAGATTAG   |
| TEF1T_AdFAR F   | CTTCAGGGCAAGCTCCACCATGCGTACTCCAAGCTATAAGGAGATTGATAAGACTTTTC    |
